# Supplementary material
Source: PubMed Central journal article supplement (PMC2751862)
Supplement: NIHMS134259-supplement-1.pdf [file NIHMS134259-supplement-1.pdf]

Supplementary Figures and Table

**Thymic self-reactivity selects natural interleukin 17-producing T cells that can regulate peripheral inflammation**

Benjamin R. Marks<sup>1</sup>, Heba N. Nowyhed<sup>1</sup>, Jin-Young Choi<sup>2</sup>, Amanda C. Poholek<sup>3</sup>, Jared M. Odegard<sup>1</sup>, Richard A. Flavell<sup>1,4</sup> and Joe Craft<sup>1,2</sup>

<sup>1</sup>Department of Immunobiology, <sup>2</sup>Section of Rheumatology, Department of Internal Medicine,

<sup>3</sup>Department of Cell Biology, <sup>4</sup>Howard Hughes Medical Institute, Yale School of Medicine, New Haven, CT 06520, USA

**Supplementary Table 1:** DTg and STg mice showed comparable survival at age 1 year.

| <b>Group</b>    | <b>Alive at 1 year</b> |
|-----------------|------------------------|
| B10.AND×PCC (M) | 21/22                  |
| B10.AND×PCC (F) | 12/12                  |
| B10.AND (M)     | 3/3                    |
| B10.AND (F)     | 3/3                    |
| B10.PCC (M)     | 10/11                  |
| B10.PCC (F)     | 6/6                    |

M = male F = female. Right column indicates number of mice surviving to 1 year of age divided by the number of mice in the initial cohort.

**Supplementary Table 2: RT-PCR primer sequences**

| Name          | Forward                         | Reverse                            |
|---------------|---------------------------------|------------------------------------|
| <i>Actb</i>   | 5'-AGAGGGAAATCGTGCGTGAC-3'      | 5'-CAATAGTGATGACCTGGCCGT-3'        |
| <i>Ii17</i>   | 5'-CTGGAGGATAACACTGTGAGAGT-3'   | 5'-TGCTGAATGGCGACGGAGTTC-3'        |
| <i>Ifng</i>   | 5'-GATGCATTCATGAGTATTGCCAAGT-3' | 5'-GTGGACCACTCGGATGAGCTC-3'        |
| <i>Ii22</i>   | 5'-CATGCAGGAGGTGGTACCTT-3'      | 5'-CAGACGCAAGCATTCTCAG-3'          |
| <i>Ii23r</i>  | 5'-GCCAAGAAGACCATTCCCGA-3'      | 5'-TCAGTGCTACAATCTTCTTCAGAGGACA-3' |
| <i>Ii10</i>   | 5'-CCCTTTGCTATGGTGTCTT-3'       | 5'-TGGTTTCTCTTCCCAAGACC-3'         |
| <i>Rorc</i>   | 5'-CCGCTGAGAGGGCTTCAC-3'        | 5'-TGCAGGAGTAGGCCACATTACA-3'       |
| <i>Rag 1</i>  | 5'-CATTCTAGCACTCTGGCCGG-3'      | 5'-TCATCGGGGCAGAACTGAA-3'          |
| <i>Hprt 1</i> | 5'-CCAGCAAGCTTGCAACCTTAACCA-3'  | 5'-GTAATGATCAGTCAACGGGGGAC-3'      |

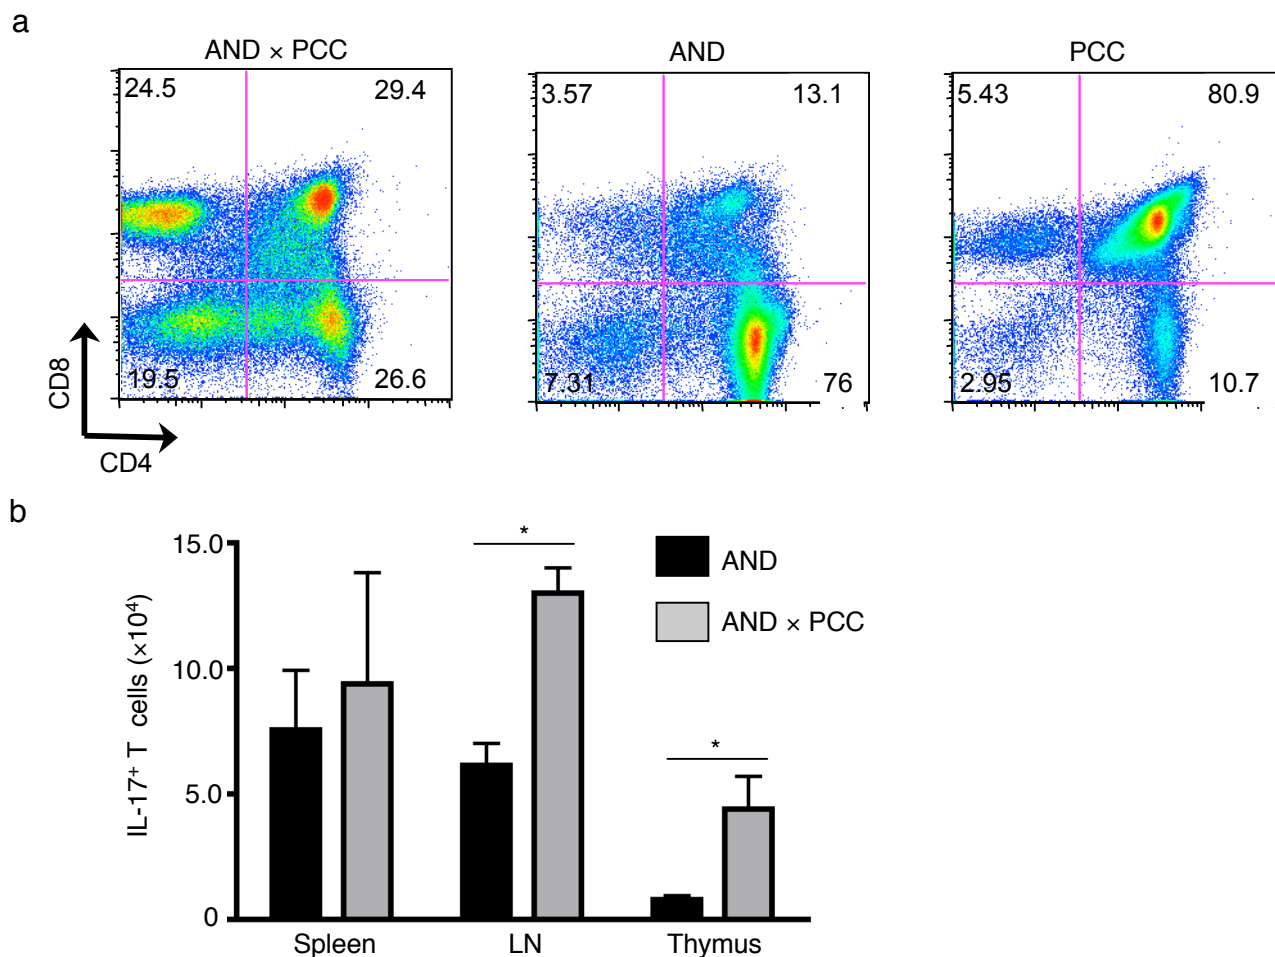

**Supplementary Figure 1** Cellularity of the thymus is reduced in DTg mice while the total number of IL-17<sup>+</sup> T cells is increased. **(a)** Percentages of CD4<sup>+</sup>CD8<sup>+</sup>, CD4<sup>+</sup>CD8<sup>-</sup> and CD8<sup>+</sup>CD4<sup>-</sup> cells of TCRβ<sup>+</sup> thymocytes were measured by flow cytometry in DTg, STg AND and STg PCC mice, with data representative of 5 independent experiments. **(b)** Absolute numbers of TCRβ<sup>+</sup>CD4<sup>+</sup>CD8<sup>-</sup>IL-17<sup>+</sup> cells in the spleen, LN and thymi of DTg and STg mice were determined by counting numbers of cells in each organ and using percentages obtained by FACS staining ( $P \leq 0.05$ ; 3 mice per group, 1 experiment).

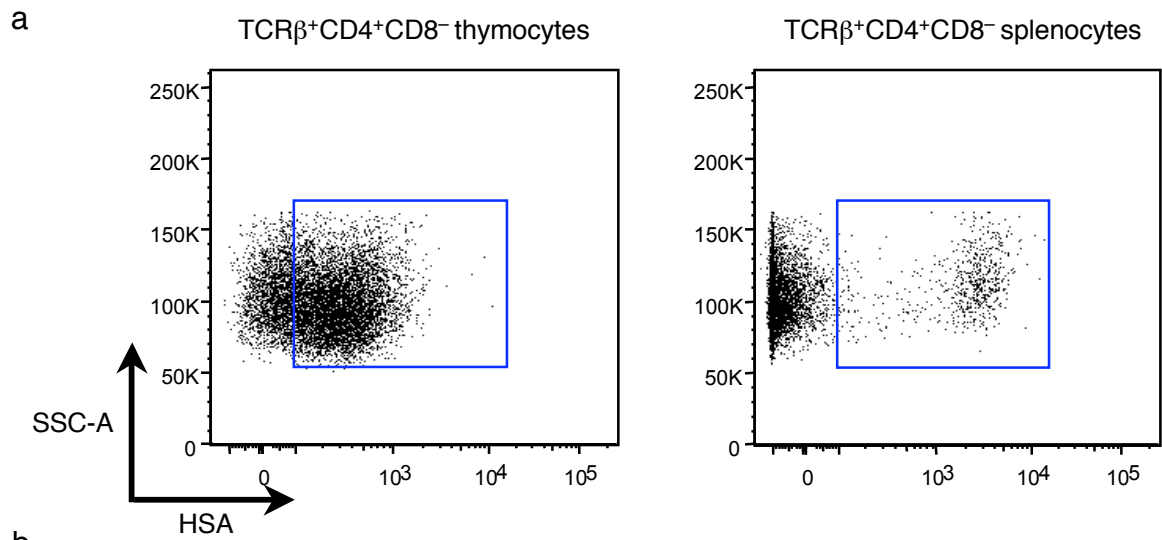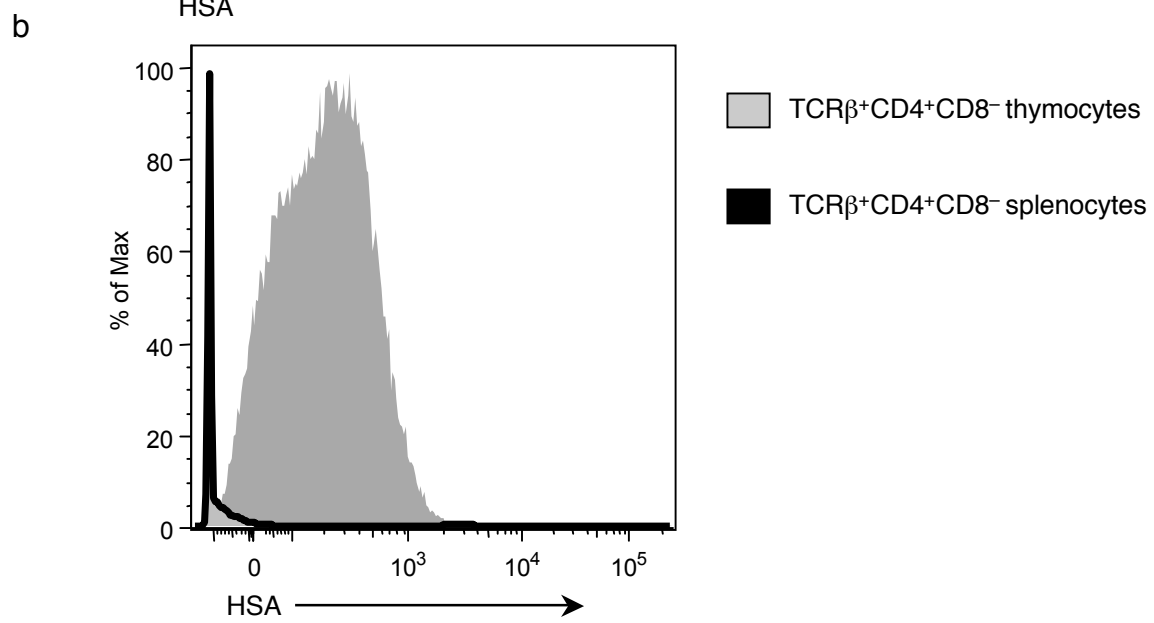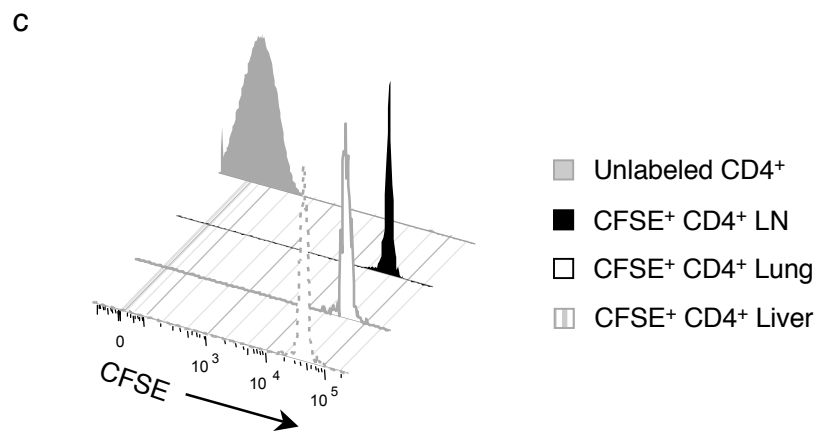

**Supplementary Figure 2** HSA (CD24) positive thymocytes were sorted from DTg mice.

(a) TCR $\beta$ +CD4+CD8–thymocytes from DTg mice were sorted based on HSA expression

using splenocytes to determine gating. (b) Histogram of HSA expression on

TCR $\beta$ +CD4+CD8– thymocytes (gray) compared to TCR $\beta$ +CD4+CD8– splenocytes

(black). Data are representative of 3 (a,b) independent experiments. (c) Purified CD4+

DTg splenic and LN T cells labeled with CFSE were transferred to wild type recipients;

five days following transfer, CFSE dilution of transferred cells in the LN, liver, lungs, and

thymi of recipient mice was determined. Data are representative of 2 experiments, with

2-3 mice per experiment.

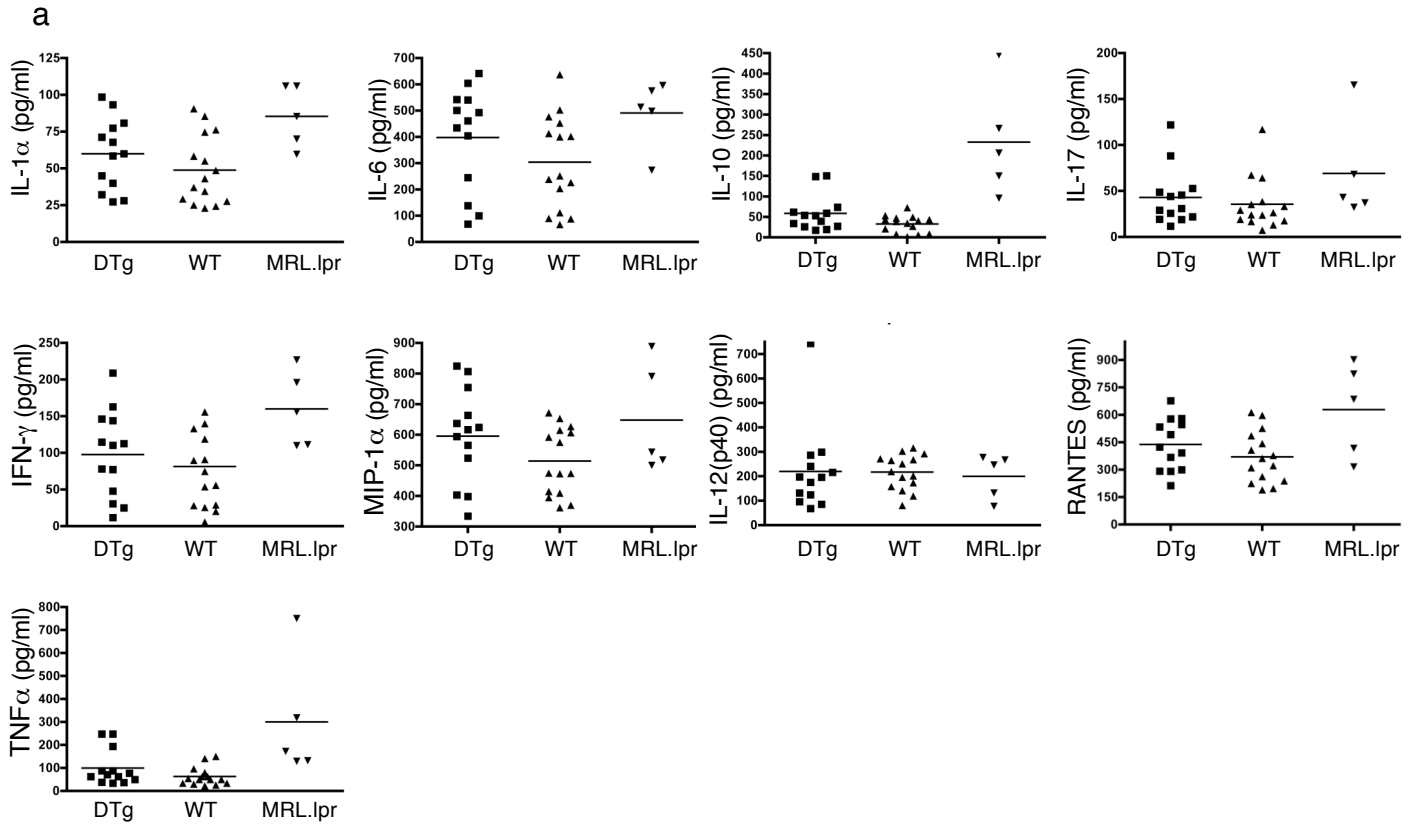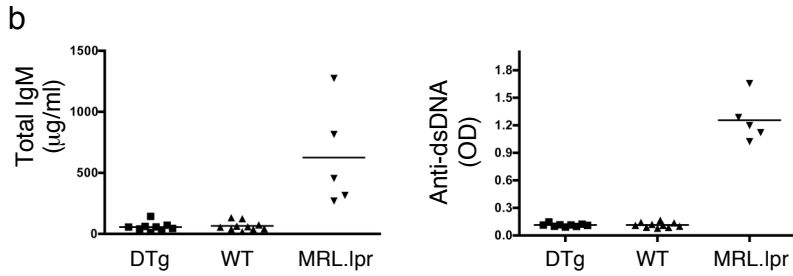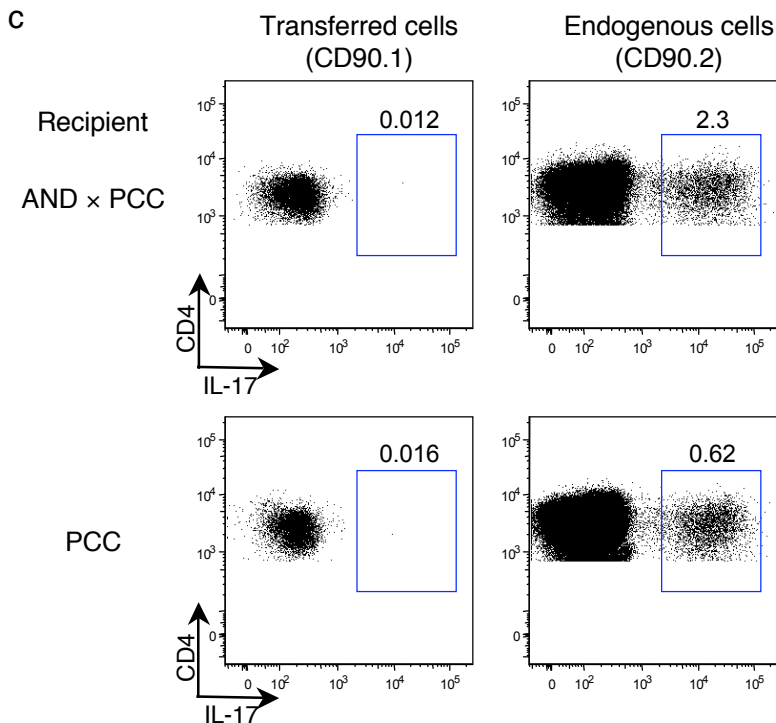

**Supplementary Figure 3** DTg mice do not spontaneously develop autoimmunity and their peripheral environment does not promote T<sub>H</sub>-17 cell development. **(a,b)** Serum concentrations of inflammatory cytokines and chemokines, including IL-1 $\alpha$ , IL-6, IL-10, IL-17, IFN- $\gamma$ , MIP-1 $\alpha$ , IL-12(p40), RANTES and TNF $\alpha$  **(a)**, and immunoglobulins, including IgM and anti-dsDNA **(b)** were calculated from DTg, wild-type and lupus-prone MRL/*Fas*<sup>lpr</sup> mice (13 DTg, 15 wild-type, and 5 MRL mice, with 1 experiment). **(c)** Enriched CD4<sup>+</sup> T cells from AND.*Rag1*<sup>-/-</sup>.CD90.1 mice were transferred to DTg and PCC STg CD90.2 mice and 5 days later the percentages of IL-17<sup>+</sup> cells among CD90.1 (transferred) and CD90.2 (recipient) TCR $\beta$ <sup>+</sup>CD4<sup>+</sup> cells were determined by flow cytometry. Data are representative of 3 mice.



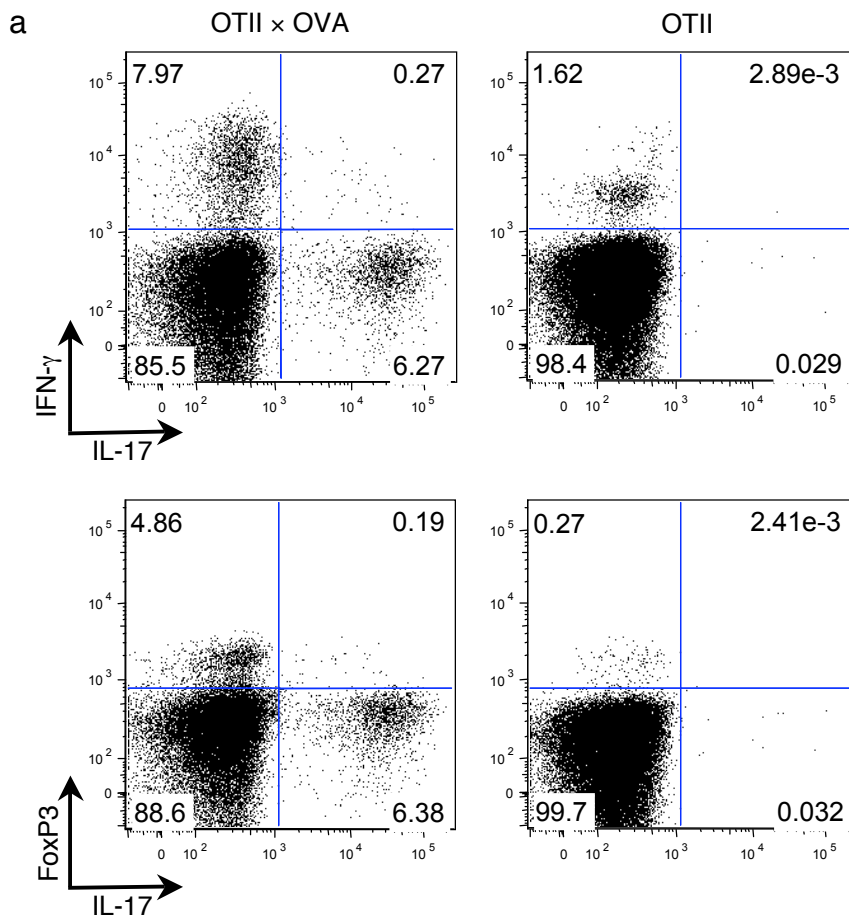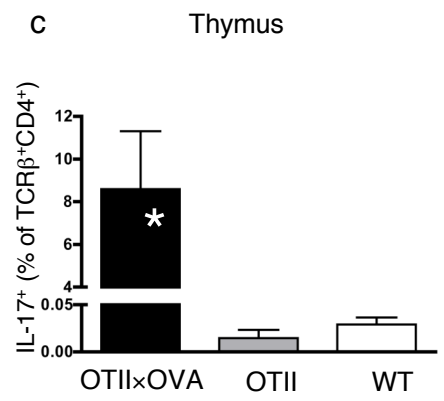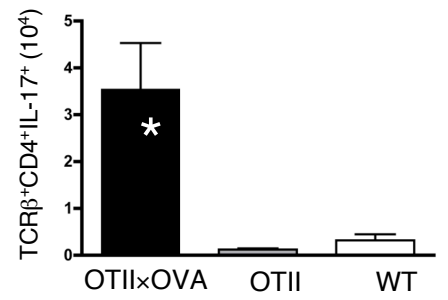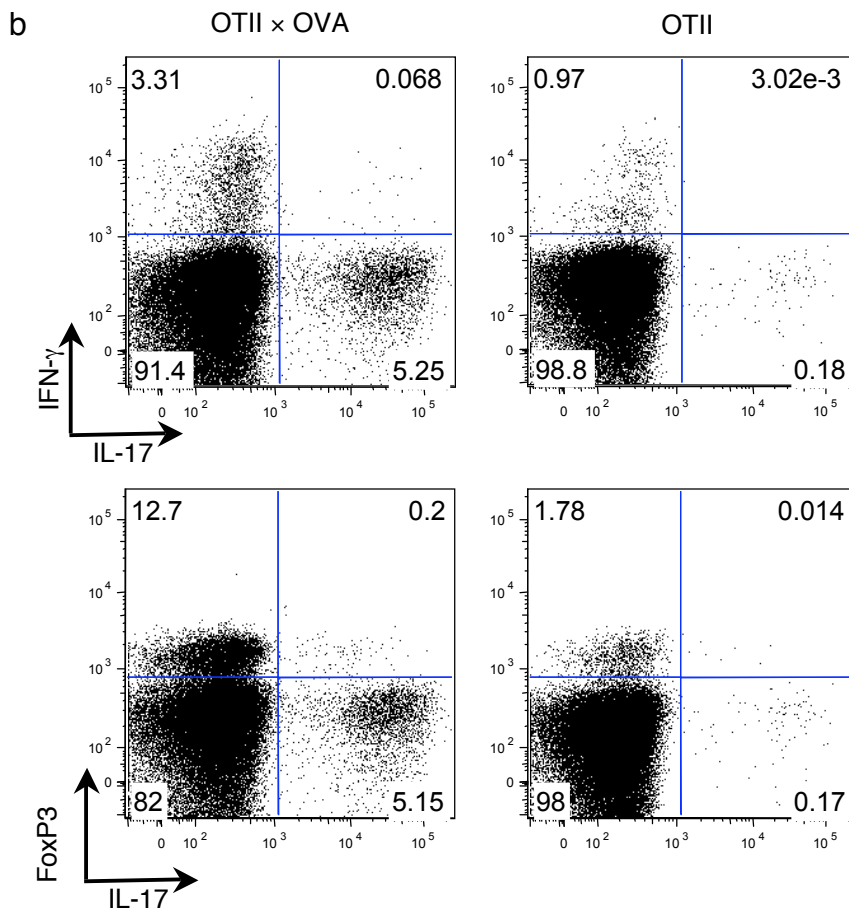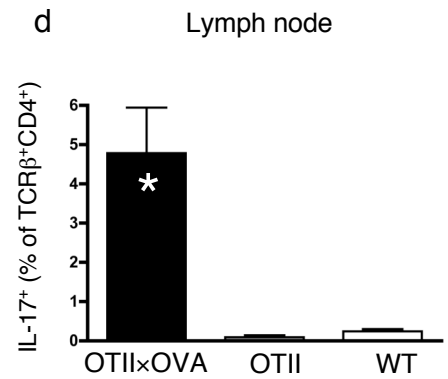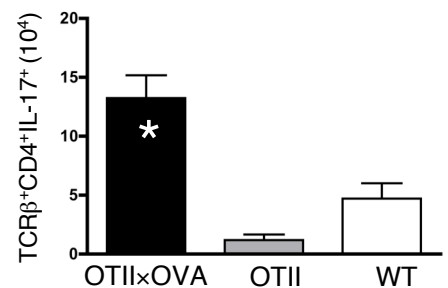

**Supplementary Figure 4** Thymi and LN of OTII ×OVA DTg mice are enriched for IL -17+ cells.

**(a,b)** The frequencies of IL-17+, IFN- $\gamma$ + and FoxP3+ cells among TCR $\beta$ +CD4+ T cells from the thymus **(a)** and the LN **(b)** were assessed by intracellular staining. **(c,d)** The percentage of IL-17+ among TCR $\beta$ +CD4+ cells and the absolute number of IL-17+ T cells from thymi **(c)** and the LN **(d)** of OTII ×OVA DTg, OTII STg, and wild -type mice are displayed ( $P \leq 0.05$ ; 3 mice in each group). Data are representative of 3 **(a,b)** or 2 **(c,d)** independent experiments.

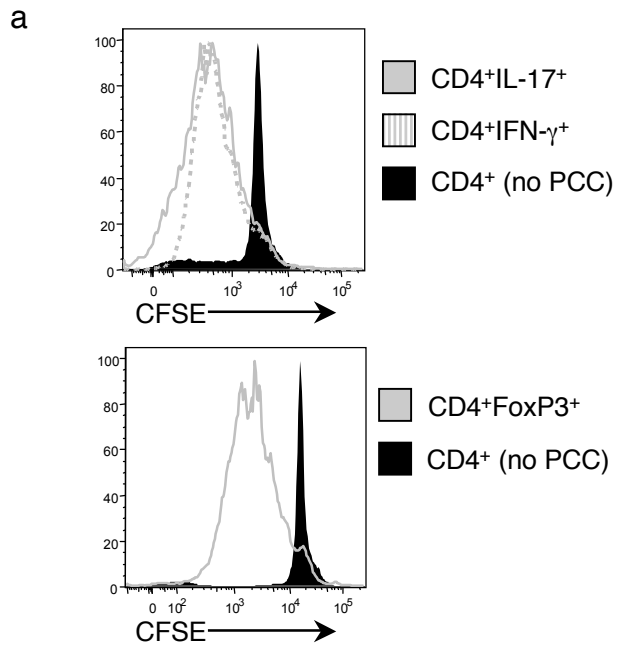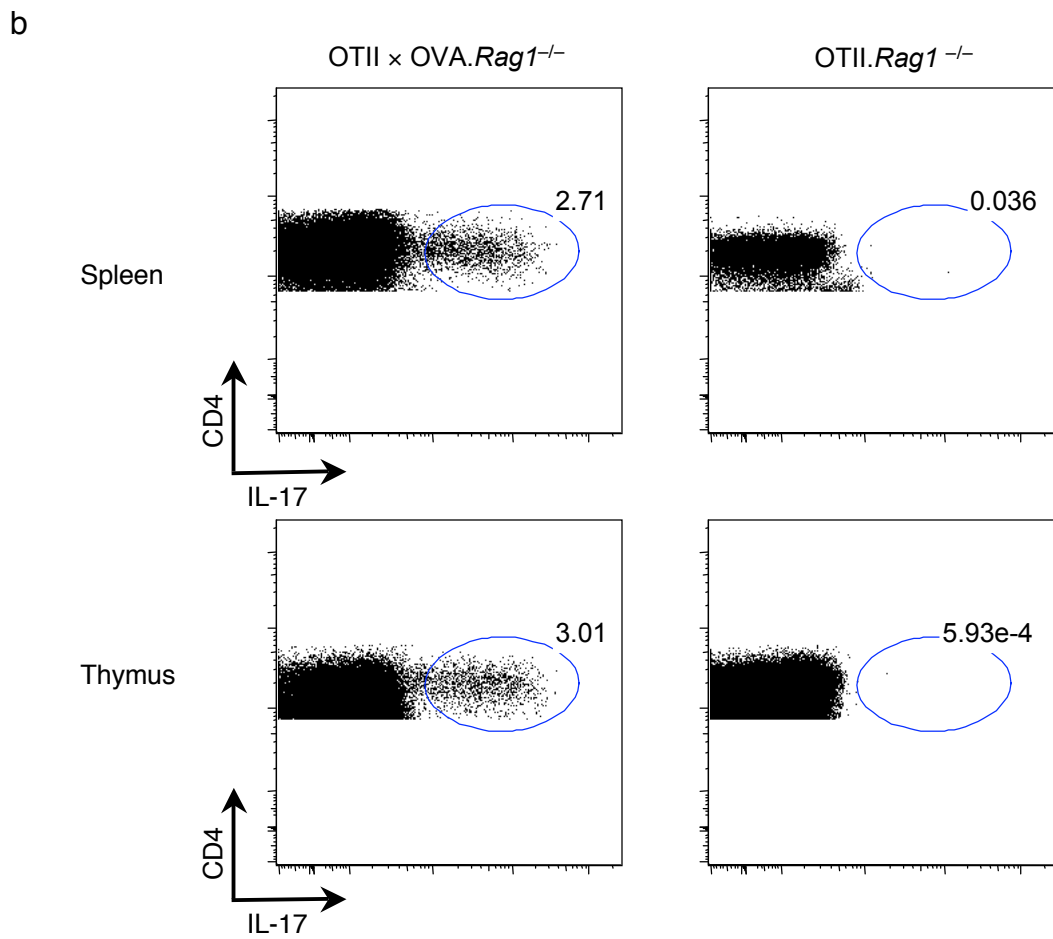

**Supplementary Figure 5** T<sub>H</sub>-17 cells proliferate in response to PCC and develop in *Rag1*<sup>-/-</sup> DTg mice. **(a,b)** Splenocytes from AND × PCC mice were enriched for CD4<sup>+</sup> T cells, labeled with CFSE and cultured for 3 days with 10μg/ml PCC<sub>88-14</sub> peptide and T depleted splenocytes to evaluate proliferation of IL-17<sup>+</sup> (■ solid line), IFN-γ<sup>+</sup> (■ dotted line) or FoxP3<sup>+</sup> T cells (■ solid line) compared to unstimulated T cell cultures (■ solid line). **(b)** Percentages of IL-17<sup>+</sup> T cells of TCRβ<sup>+</sup>CD4<sup>+</sup> in the spleen and thymus of *Rag1*<sup>-/-</sup> DTg and STg mice were measured by flow cytometry. Data are representative of 2 **(a,b)** independent experiments.

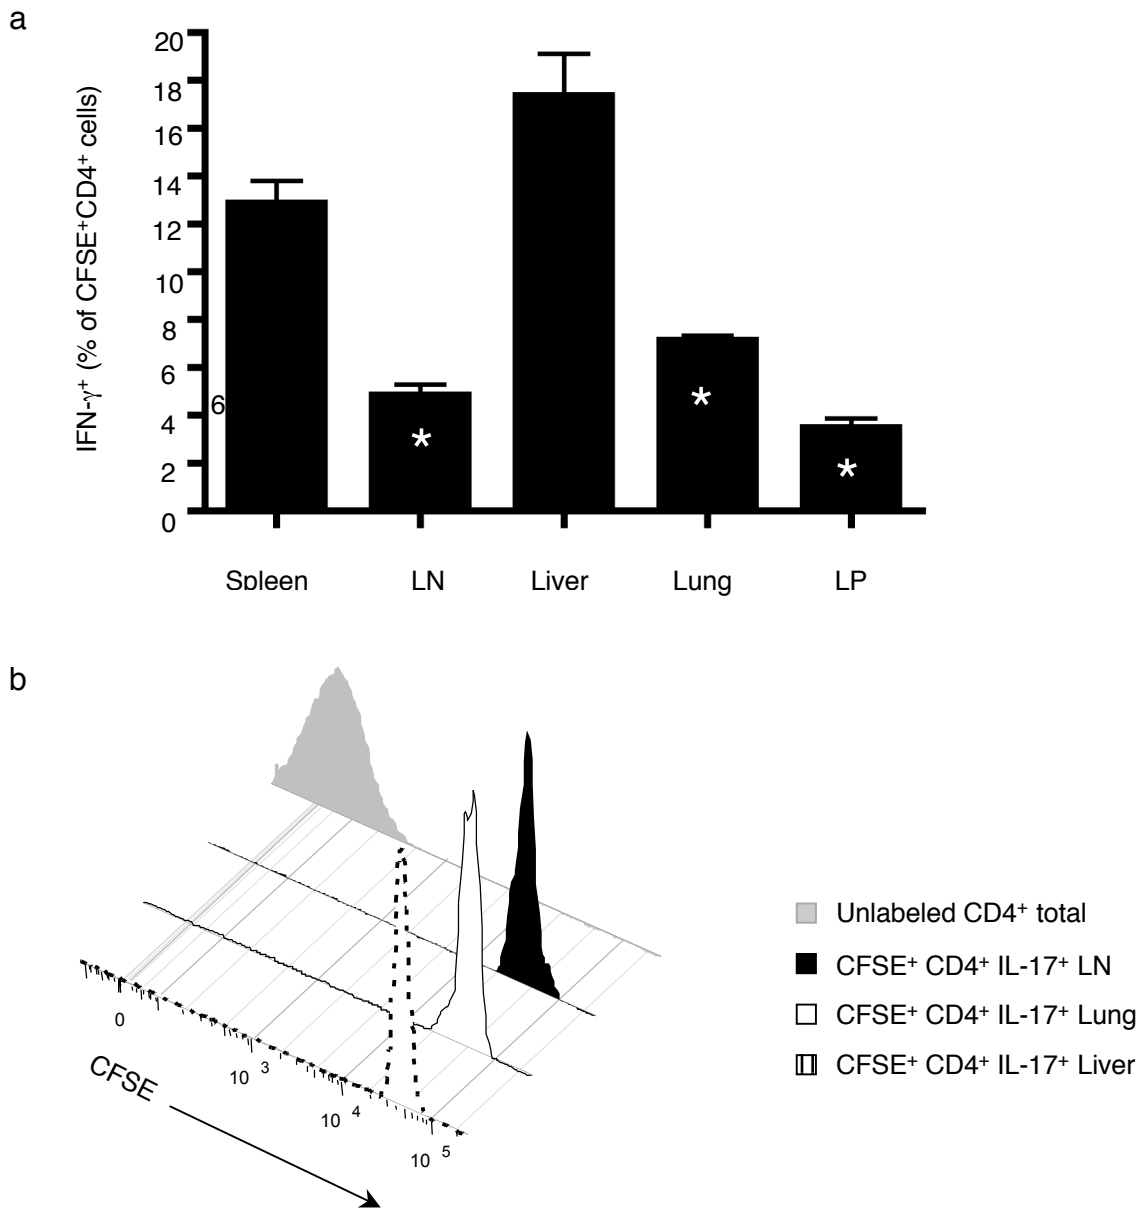

**Supplementary Figure 6** Migration pattern of T<sub>H</sub>1 cells from DTg mice. **(a)** Purified splenic and LN CD4<sup>+</sup> DTg T cells, labeled with CFSE, were transferred to wild-type recipients and percentages of IFN- $\gamma$ <sup>+</sup> cells among CFSE<sup>+</sup>CD4<sup>+</sup> cells were measured in the spleen, lymph nodes, liver, lung, and lamina propria at two days post transfer ( $P \leq 0.05$ , compared to spleen; 4 recipient mice examined, representative of 2 independent experiments). **(b)** Purified splenic and LN CD4<sup>+</sup> DTg T cells labeled with CFSE were transferred to wild type recipients and CFSE expression in CD4<sup>+</sup>IL-17<sup>+</sup> cells in peripheral organs were evaluated two days later, with data representative of 3 independent experiments, each using 2-3 recipient mice.

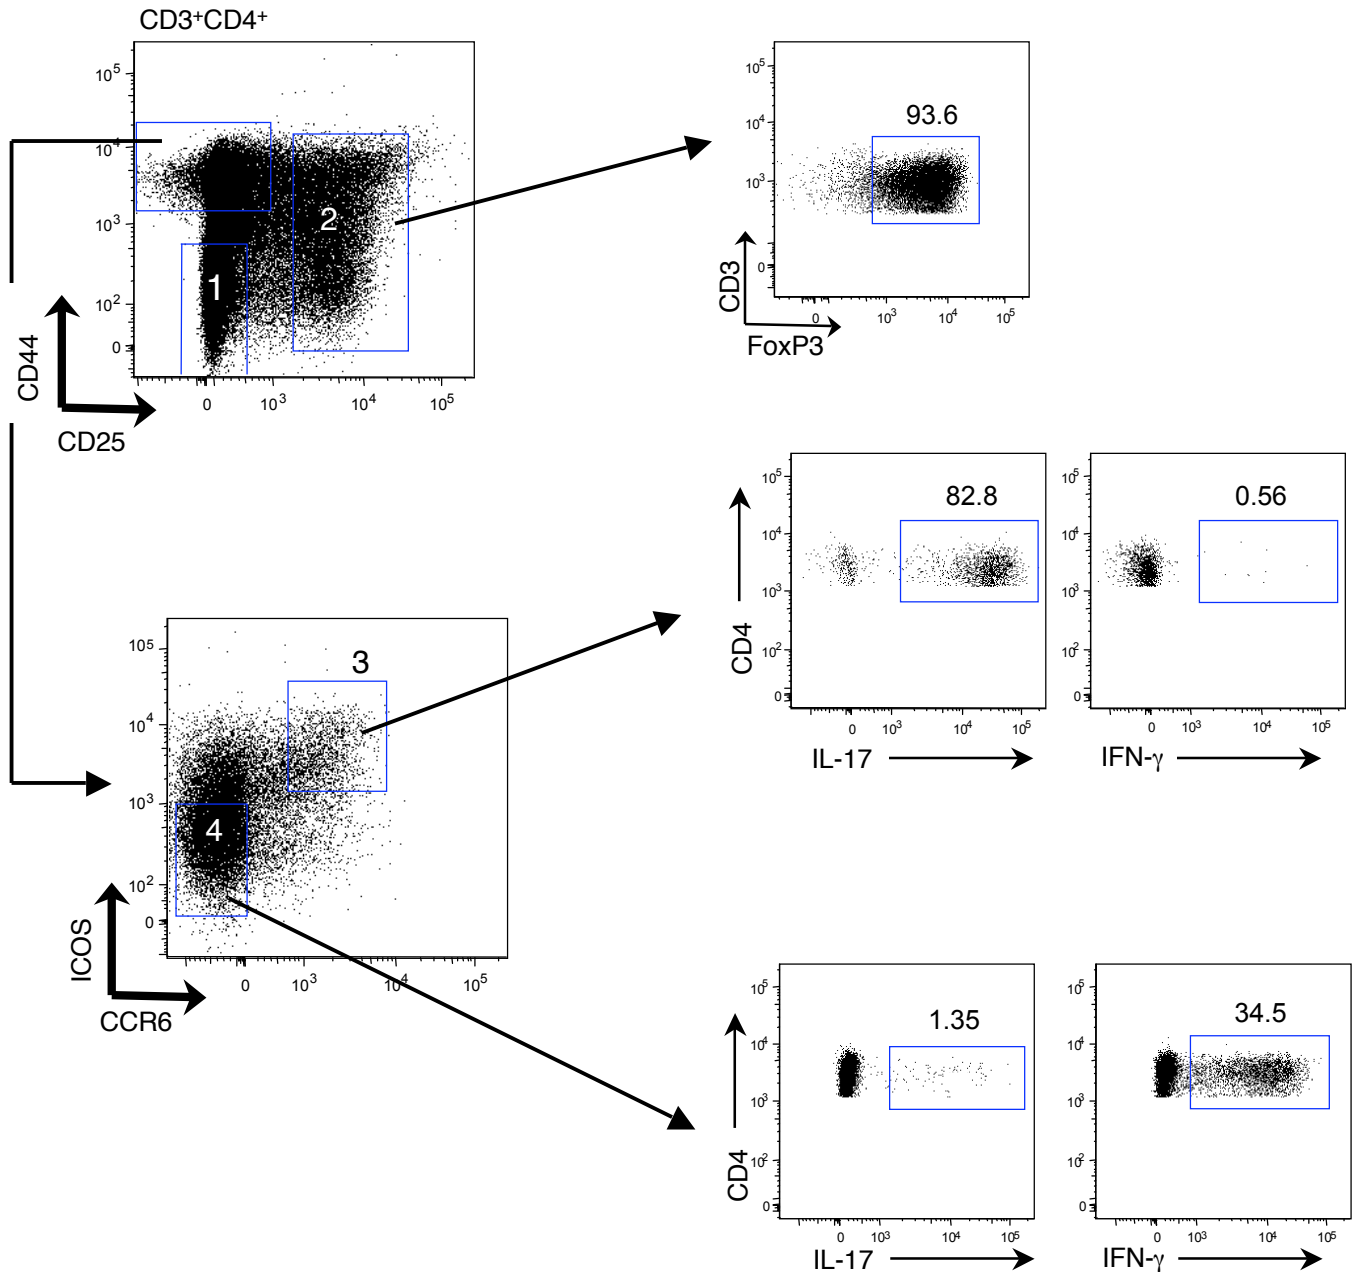

**Supplementary Figure 7**  $T_H$ -17 cells can be purified from LN and spleens of DTg mice. LN and spleen cells from DTg mice were sorted by gating on  $CD3^+CD4^+$  cells, followed by separation into  $CD44^-CD25^-$  (naïve),  $CD25^+$  ( $T_H$ ), and  $CD44^+$  gates, with the latter further purified into  $CCR6^+ICOS^{hi}$  ( $T_H$ -17) and  $CCR6^-ICOS^{lo}$  ( $T_H$ 1) populations. FoxP3, IL-17 and IFN- $\gamma$  were measured by intracellular staining.

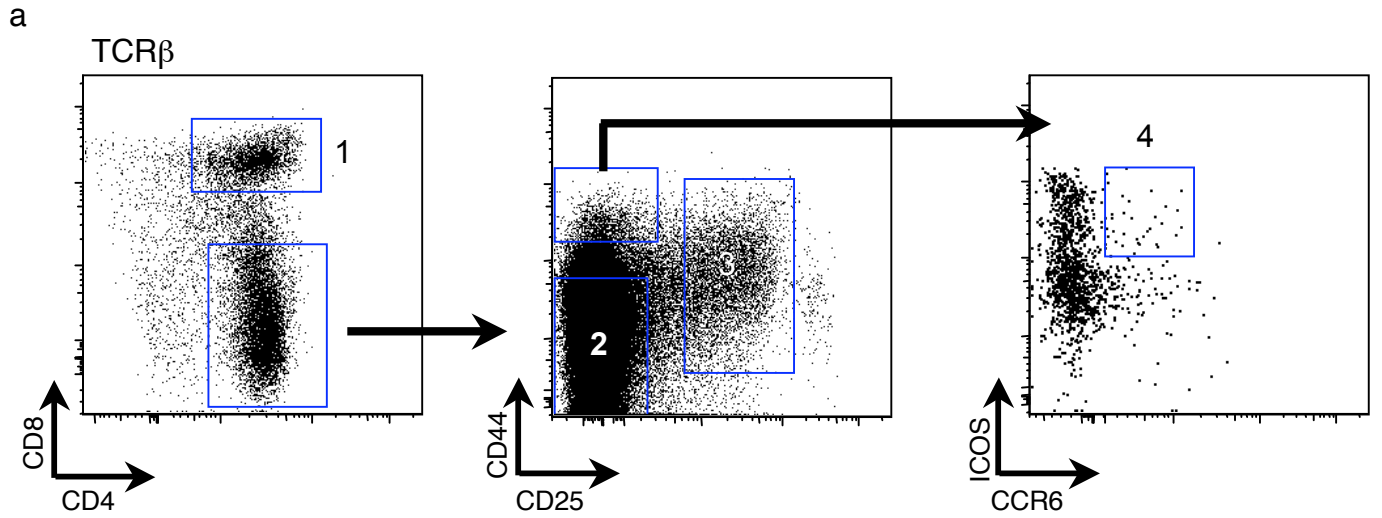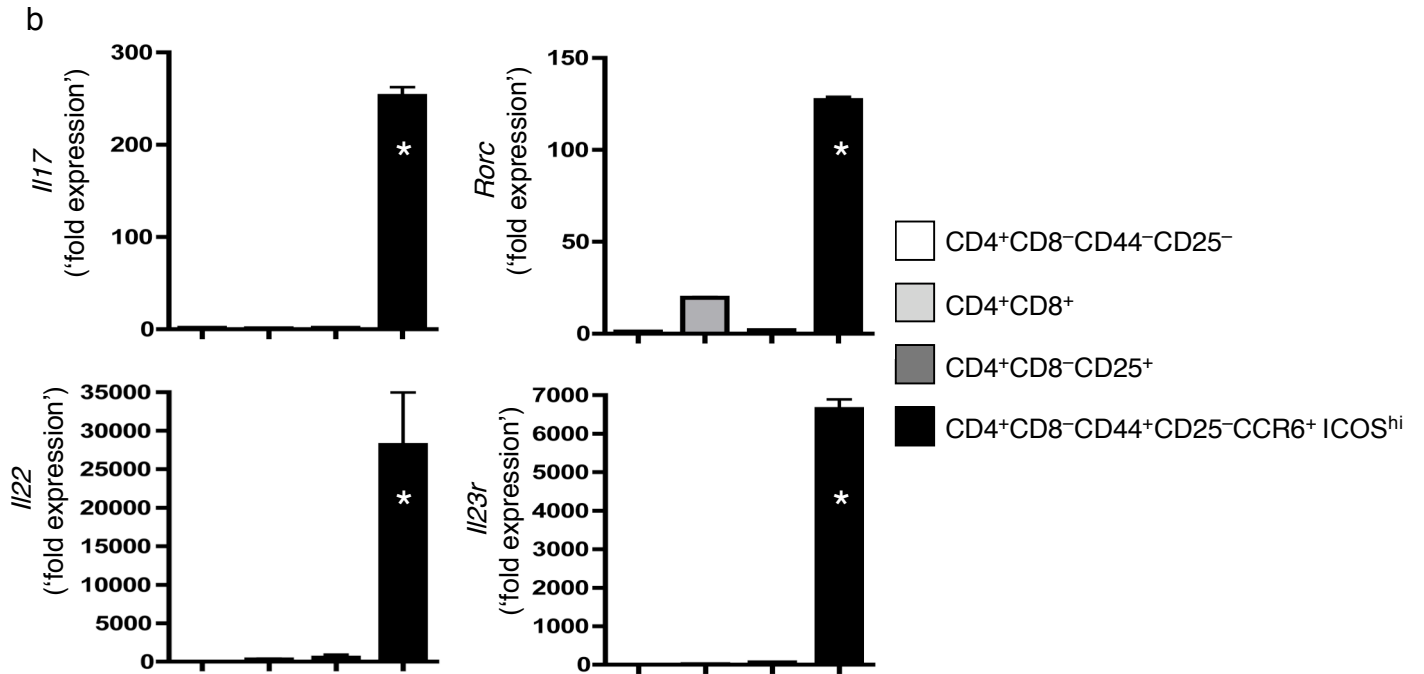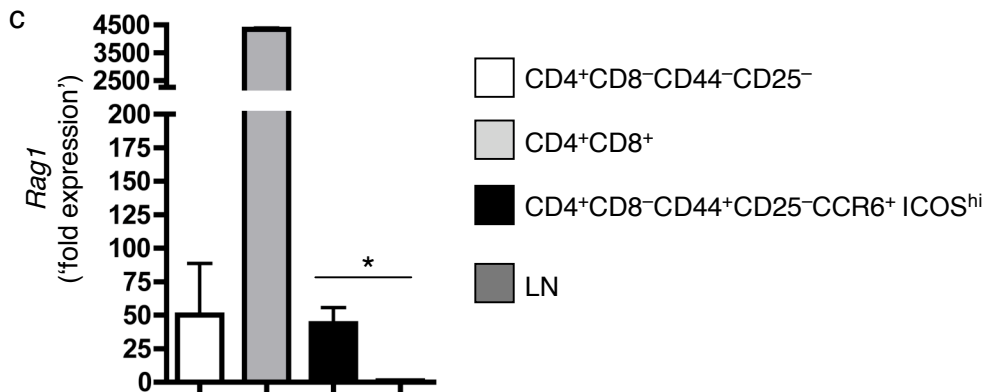

**Supplementary Figure 8** T<sub>H</sub>-17 cells from the thymus of DTg mice express ROR $\gamma$ t, IL-23R, and IL-22, with RAG expression similar to CD4 SP T cells. **(a-c)** Thymocytes from DTg mice were sorted into the indicated subsets, followed by detection of mRNA expression using Q-PCR, with the ratio of gene to *Hprt* expression determined by the relative quantification method ( $\Delta\Delta C_T$ ). mRNA expression in T<sub>H</sub>-17 cells compared to DP, naïve and T<sub>reg</sub> cells **(b)**,  $P \leq 0.05$ ; compared to 3 other groups,) or, for *Rag1* expression, to LN cells **(c)**,  $P \leq 0.05$ , with data compiled from 3 replicates using 1 cell sort by flow cytometry) .



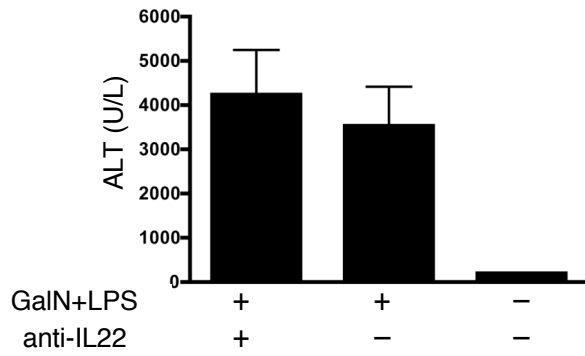

**Supplementary Figure 9** IL-22 mediated protection from toxic hepatitis is dependent upon transfer of DTg T cells. Serum aspartate aminotransferase (ALT) was measured in sera taken from mice 5 h post GalN+LPS treatment, with or without 2h pre-treatment with an anti-IL-22 blocking antibody (4 mice per group, 1 experiment).

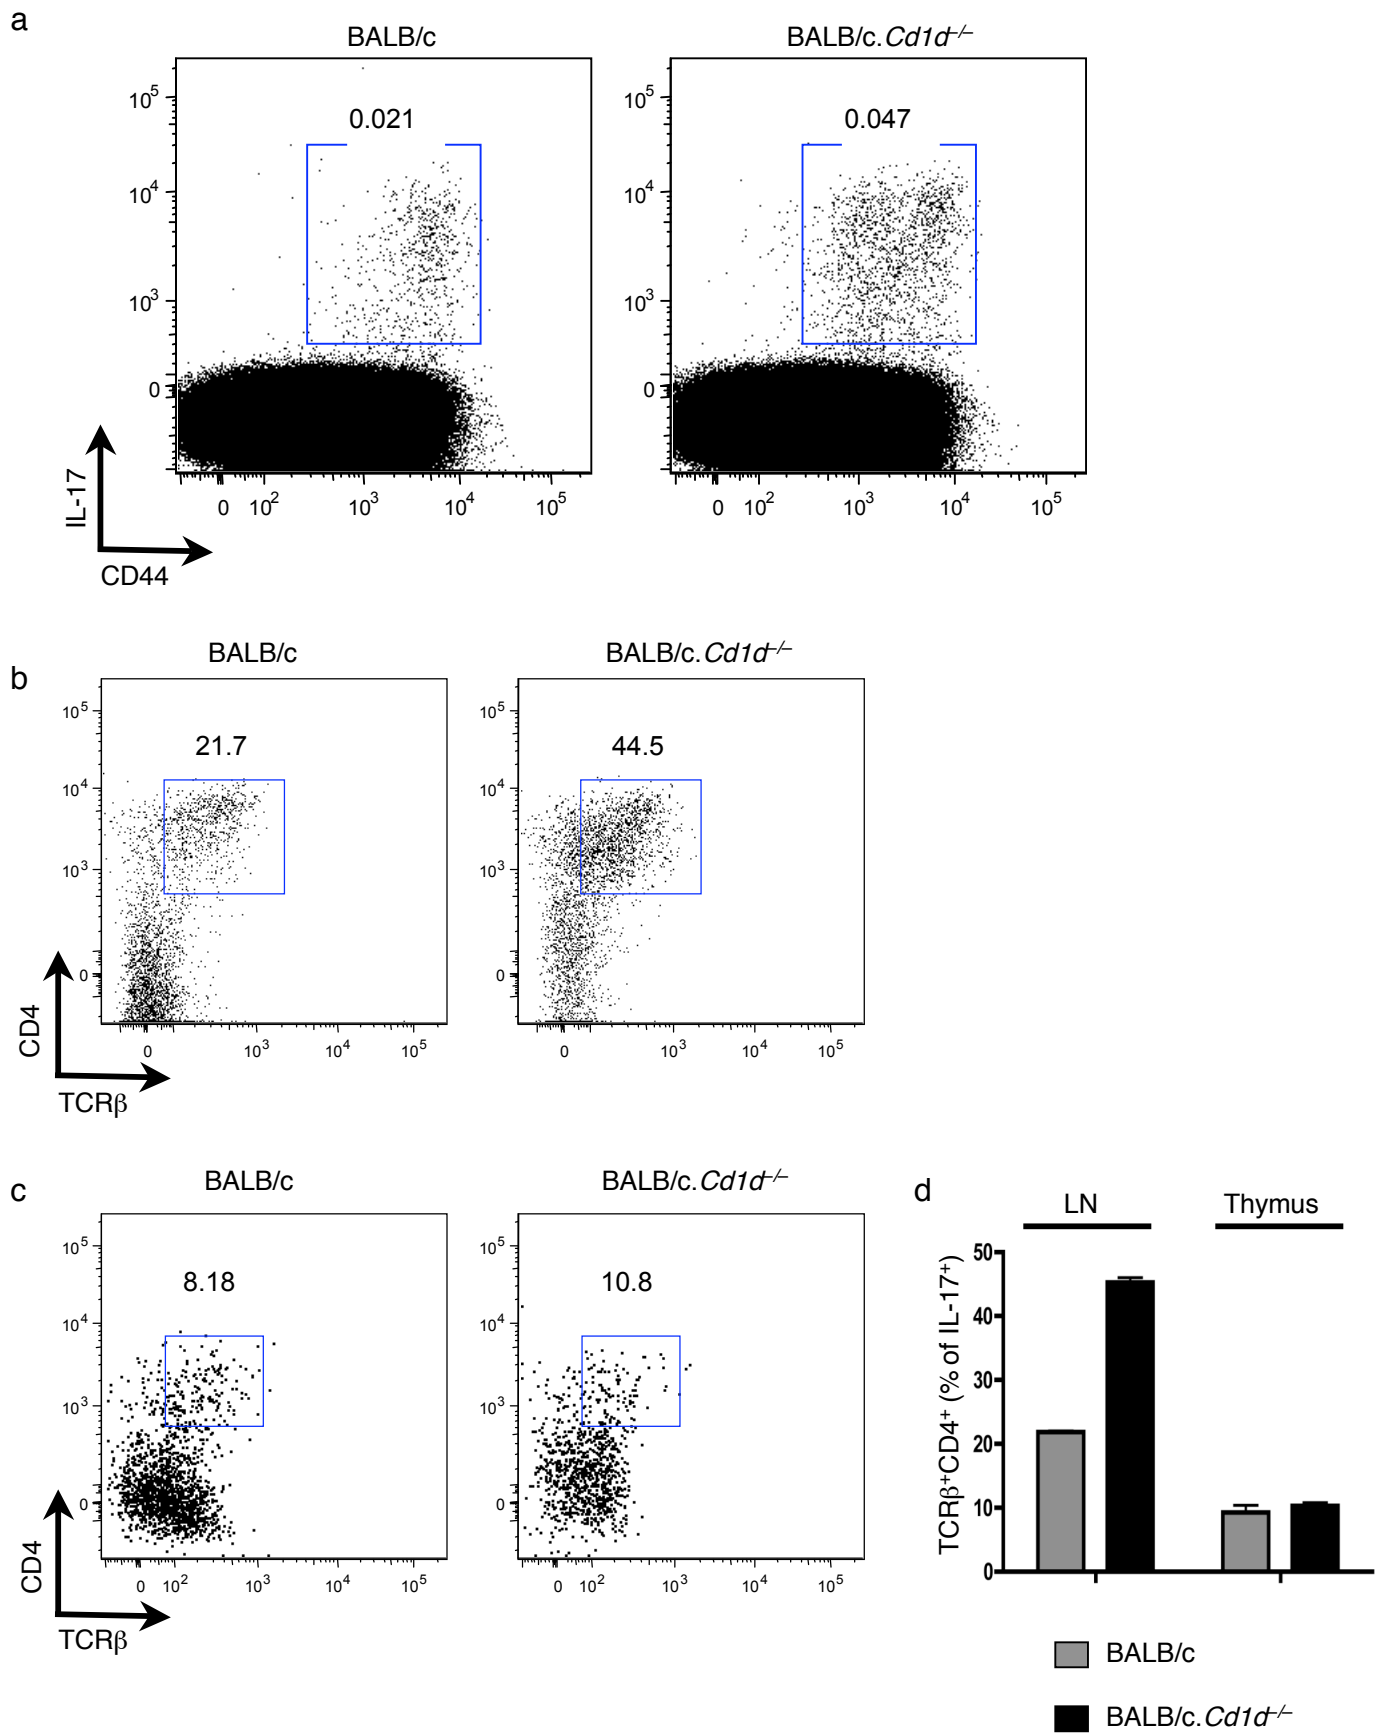

**Supplementary Figure 10**  $T_H$ -17 cells develop in the absence of CD1d. **(a-d)** The frequency of IL-17 producing  $TCR\beta^+CD4^+$  cells of the LN **(a)** or  $TCR\beta^+CD4^+$  cells among the IL-17<sup>+</sup> cells in the LN **(b,d)** or thymus **(c,d)** was compared between wild type and CD1d-deficient mice (both on BALB/c background) using intracellular cytokine staining. Data are representative of 4 mice per group **(a-c)**, with **(d)** a composite of those 4 animals.
